# Supplementary material for: Impact of Fennel Essential Oil as an Antibiotic Alternative in Rabbit Diet on Antioxidant Enzymes Levels, Growth Performance, and Meat Quality
Source: MDPI journal article supplement (doi:10.3390/antiox10111797), 2021-11-10
Supplement: s1 [file s1]

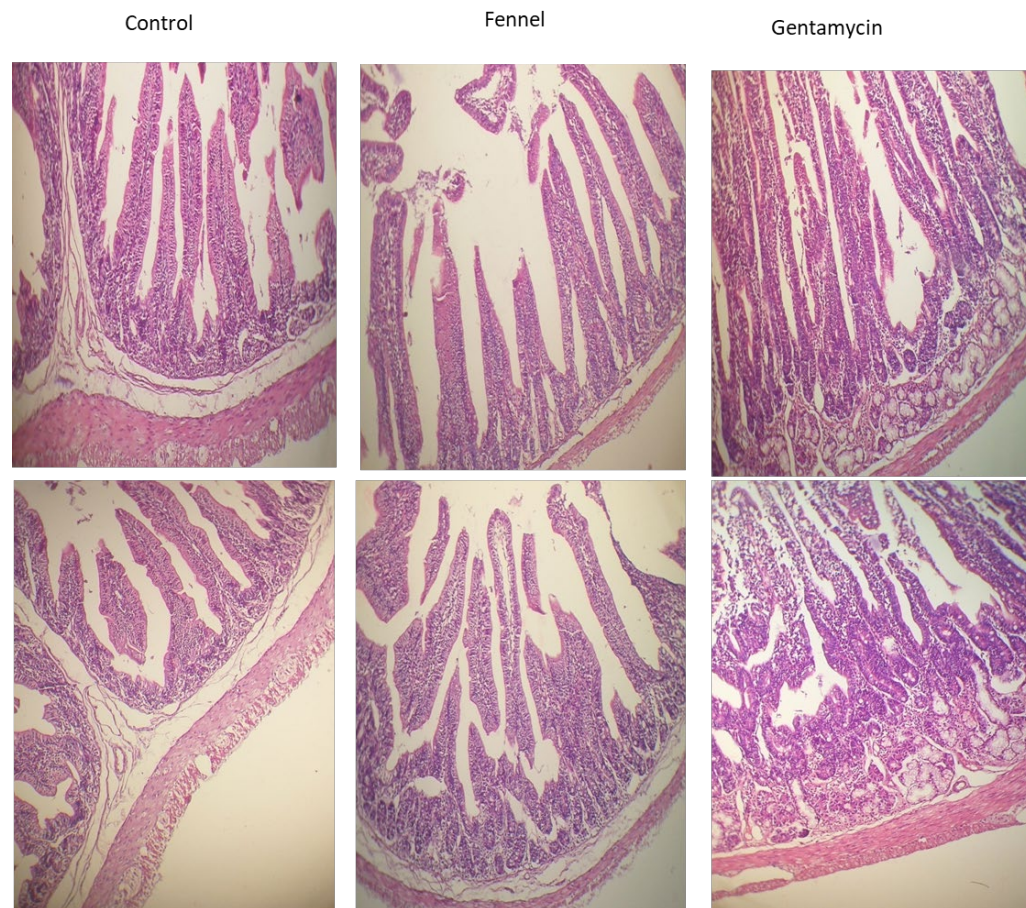

**Figure S1.** Villus morphology and morphometry characteristics of the small intestine in the rabbits receiving fennel oil and Gentamycin
